# Supplementary material for: Preparation and performance of a novel complex material Eu-modified reduced graphene oxide
Source: Royal Society of Chemistry journal article supplement (doi:10.1039/c5ra07060k), 2015-01-01
Supplement: c5ra07060k1.pdf [file c5ra07060k1.pdf]

## Preparation and performance of a novel complex material Eu-modified reduced graphene oxide

Xuefeng Zou,<sup>a</sup> Wenjun Zhang<sup>\*a</sup>

*E-mail: wjzhang@hebut.edu.cn*

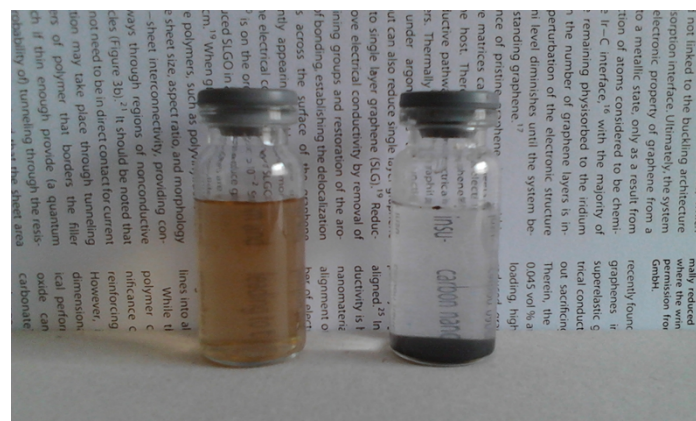

**Fig. S1** Optical images of GO (a) and Eu-GO (b) after their dispersions with 1 h sonication stand for 10 h.

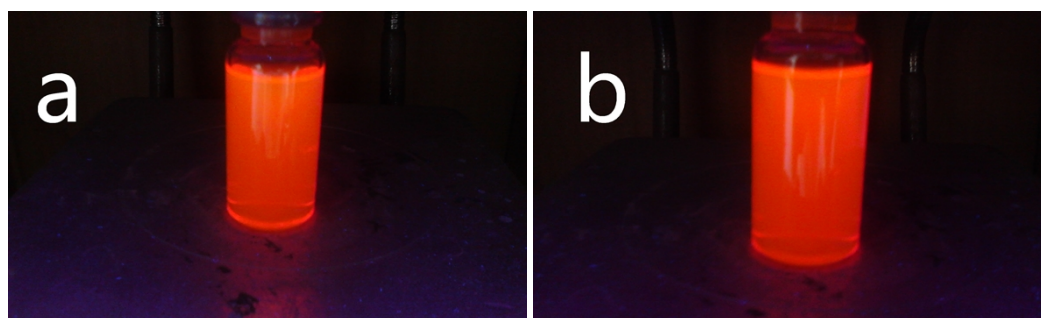

**Fig. S2** Optical images of RB (a) and RB-GO (b) under 365 nm excitation. RB and RB-GO were conducted for 6 months and 60 days in the natural light, respectively.

**Scheme 1.** Mechanism of the variation of fluorescence emissions.

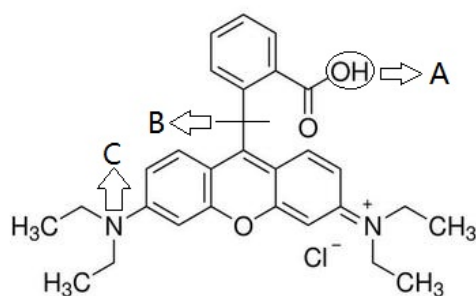

**Fig. S3** FT-IR spectra of RB (a) and ultimate product (b).
